# Supplementary material for: PIGH deficiency can be associated with severe neurodevelopmental and skeletal manifestations
Source: PubMed Central journal article supplement (PMC7839508; doi:10.1111/cge.13877), 2020-11-27
Supplement: CGE-99-313-s001.pdf [file CGE-99-313-s001.pdf]

Figure S1

|           |   |   |   |   | <b>Ser103</b> |   |   |   |   |
|-----------|---|---|---|---|---------------|---|---|---|---|
| Human     | Q | M | T | S | S             | Y | A | S | G |
| Rhesus    | Q | M | T | S | S             | Y | A | S | G |
| Mouse     | Q | M | T | S | S             | Y | A | S | G |
| Dog       | Q | M | T | S | S             | Y | A | S | G |
| Elephant  | N | L | T | P | S             | Y | T | S | A |
| Chicken   | Q | V | T | S | S             | Y | A | S | G |
| Zebrafish | Q | L | S | S | S             | Y | A | S | G |

|           |   |   |   |   | <b>Arg163</b> |   |   |   |   |
|-----------|---|---|---|---|---------------|---|---|---|---|
| Human     | S | A | K | P | R             | L | D | C | L |
| Rhesus    | S | A | K | P | R             | L | D | C | L |
| Mouse     | S | A | K | P | R             | L | D | C | L |
| Dog       | S | A | K | P | R             | L | D | C | L |
| Elephant  | S | A | K | P | R             | L | D | C | L |
| Chicken   | S | A | K | P | R             | L | D | C | L |
| Zebrafish | S | S | Q | P | R             | L | D | C | L |

**Previously published**

|           |   |   |   |   | <b>Met1</b> |   |   |   |   |
|-----------|---|---|---|---|-------------|---|---|---|---|
| Human     | - | - | - | - | M           | E | D | E | R |
| Rhesus    | - | - | - | - | M           | E | D | E | R |
| Mouse     | - | - | - | - | M           | E | D | E | K |
| Dog       | - | - | - | - | M           | E | D | E | R |
| Elephant  | - | - | - | - | M           | K | D | E | R |
| Chicken   | - | - | - | - | M           | E | - | - | R |
| Zebrafish | - | - | - | - | M           | A | D | - | - |
